# Supplementary material for: Comparative plastid genomics of Synurophyceae: inverted repeat dynamics and gene content variation
Source: PubMed Central journal article supplement (PMC6330437; doi:10.1186/s12862-018-1316-9), 2019-01-11

*Synura petersenii*  
S114, C7

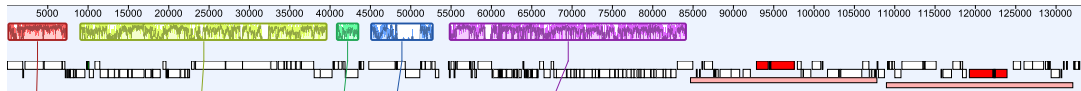

*Synura sphagnicola*  
FBCC200022

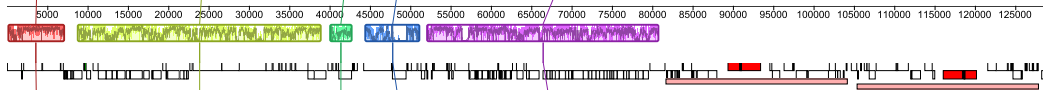

*Synura uvella*  
FBCC200023

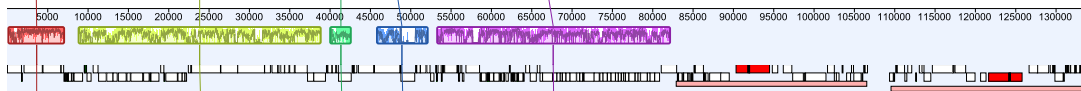

*Mallomonas splendens*  
CCMP1782

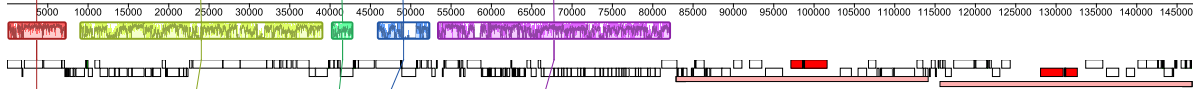

*Neotessella volvocina*  
CCMP1781

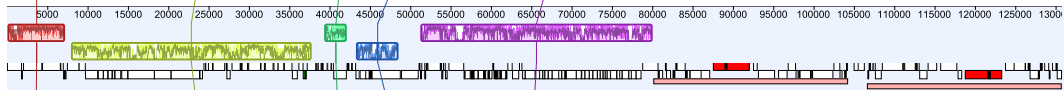

*Ochromonas* species  
CCMP1393

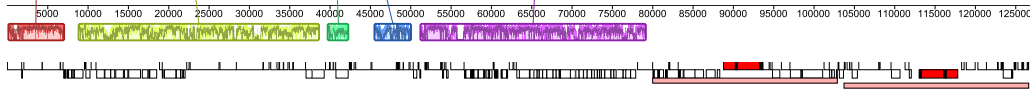

Supplement: 12862_2018_1316_MOESM1_ESM.pdf [file 12862_2018_1316_MOESM1_ESM.pdf]
