# Supplementary material for: Comparative plastid genomics of Synurophyceae: inverted repeat dynamics and gene content variation
Source: PubMed Central journal article supplement (PMC6330437; doi:10.1186/s12862-018-1316-9), 2019-01-11
Supplement: 12862_2018_1316_MOESM2_ESM.pdf [file 12862_2018_1316_MOESM2_ESM.pdf]

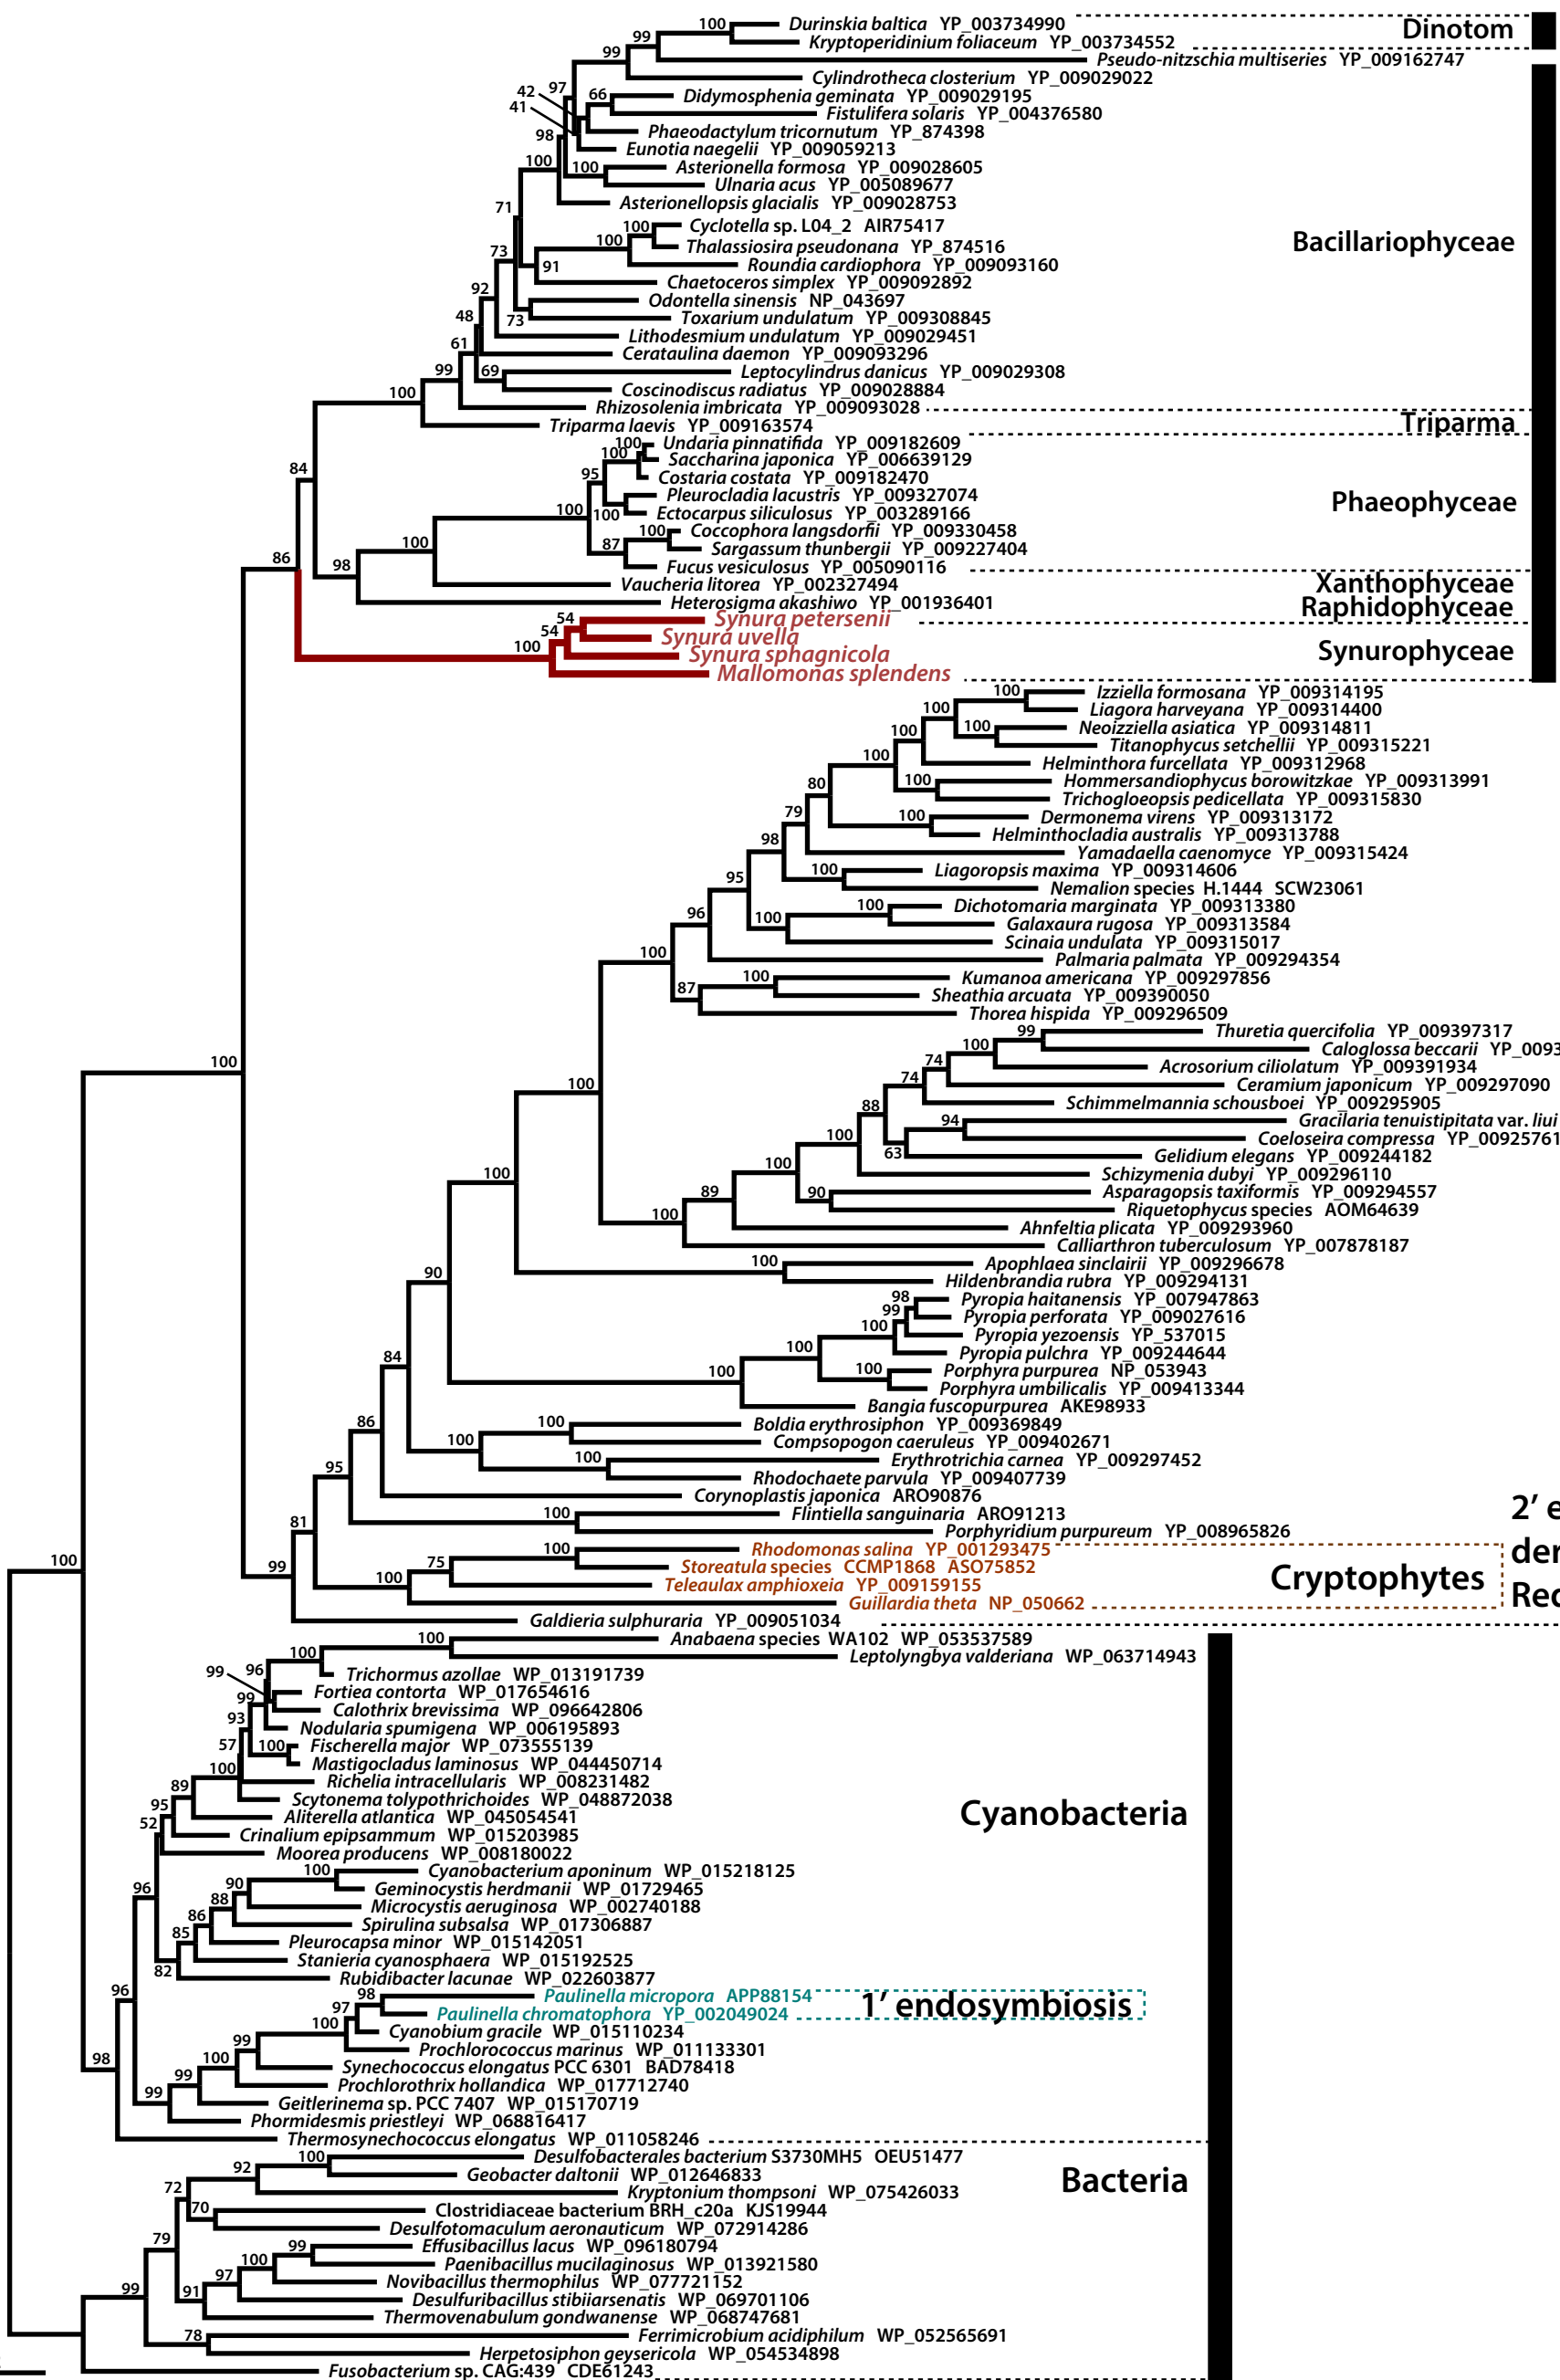

Dinophytes  
3' endosymbiosis  
derived from diatom

Stramenopiles  
2' endosymbiosis  
derived from Red-algal lineage

Rhodophytes  
1' endosymbiosis

2' endosymbiosis  
derived from  
Red-algal lineage

Cyanobacteria

1' endosymbiosis

Bacteria
