# Supplementary material for: Comparative plastid genomics of Synurophyceae: inverted repeat dynamics and gene content variation
Source: PubMed Central journal article supplement (PMC6330437; doi:10.1186/s12862-018-1316-9), 2019-01-11

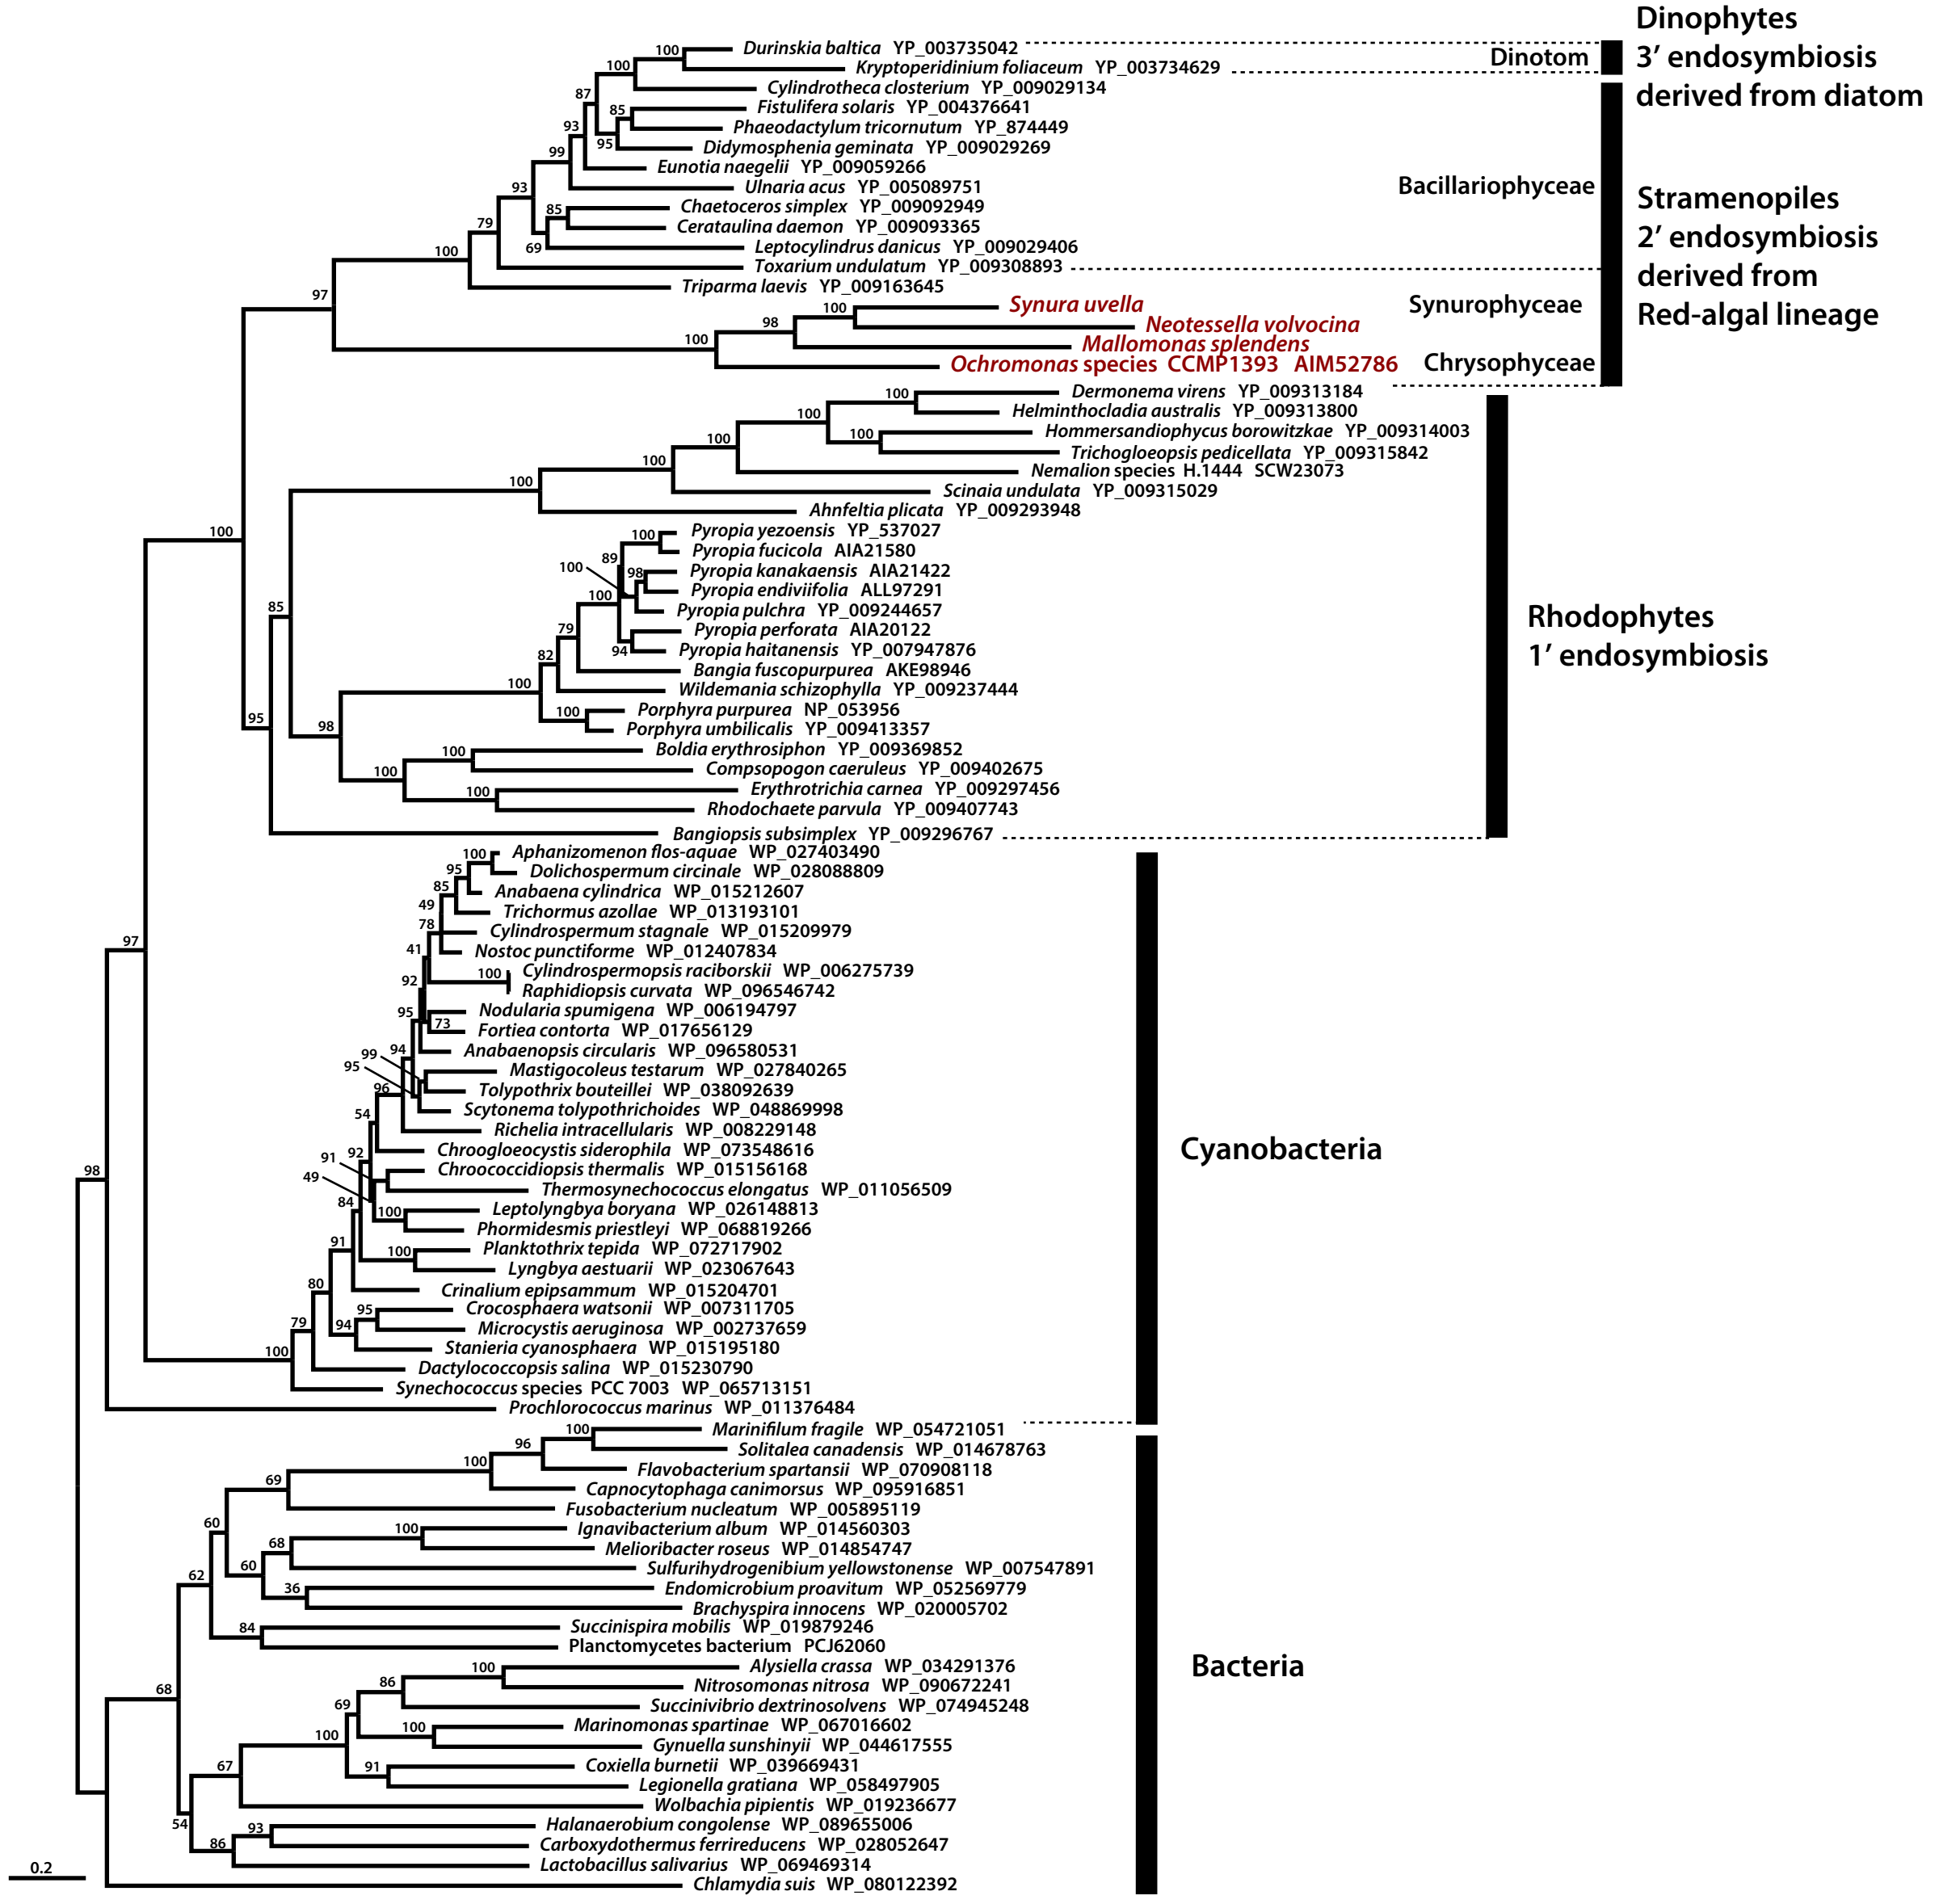

Supplement: 12862_2018_1316_MOESM3_ESM.pdf [file 12862_2018_1316_MOESM3_ESM.pdf]
