# Supplementary material for: Comparative plastid genomics of Synurophyceae: inverted repeat dynamics and gene content variation
Source: PubMed Central journal article supplement (PMC6330437; doi:10.1186/s12862-018-1316-9), 2019-01-11
Supplement: 12862_2018_1316_MOESM5_ESM.pdf [file 12862_2018_1316_MOESM5_ESM.pdf]

# The Primer Sequences for Gap Filling

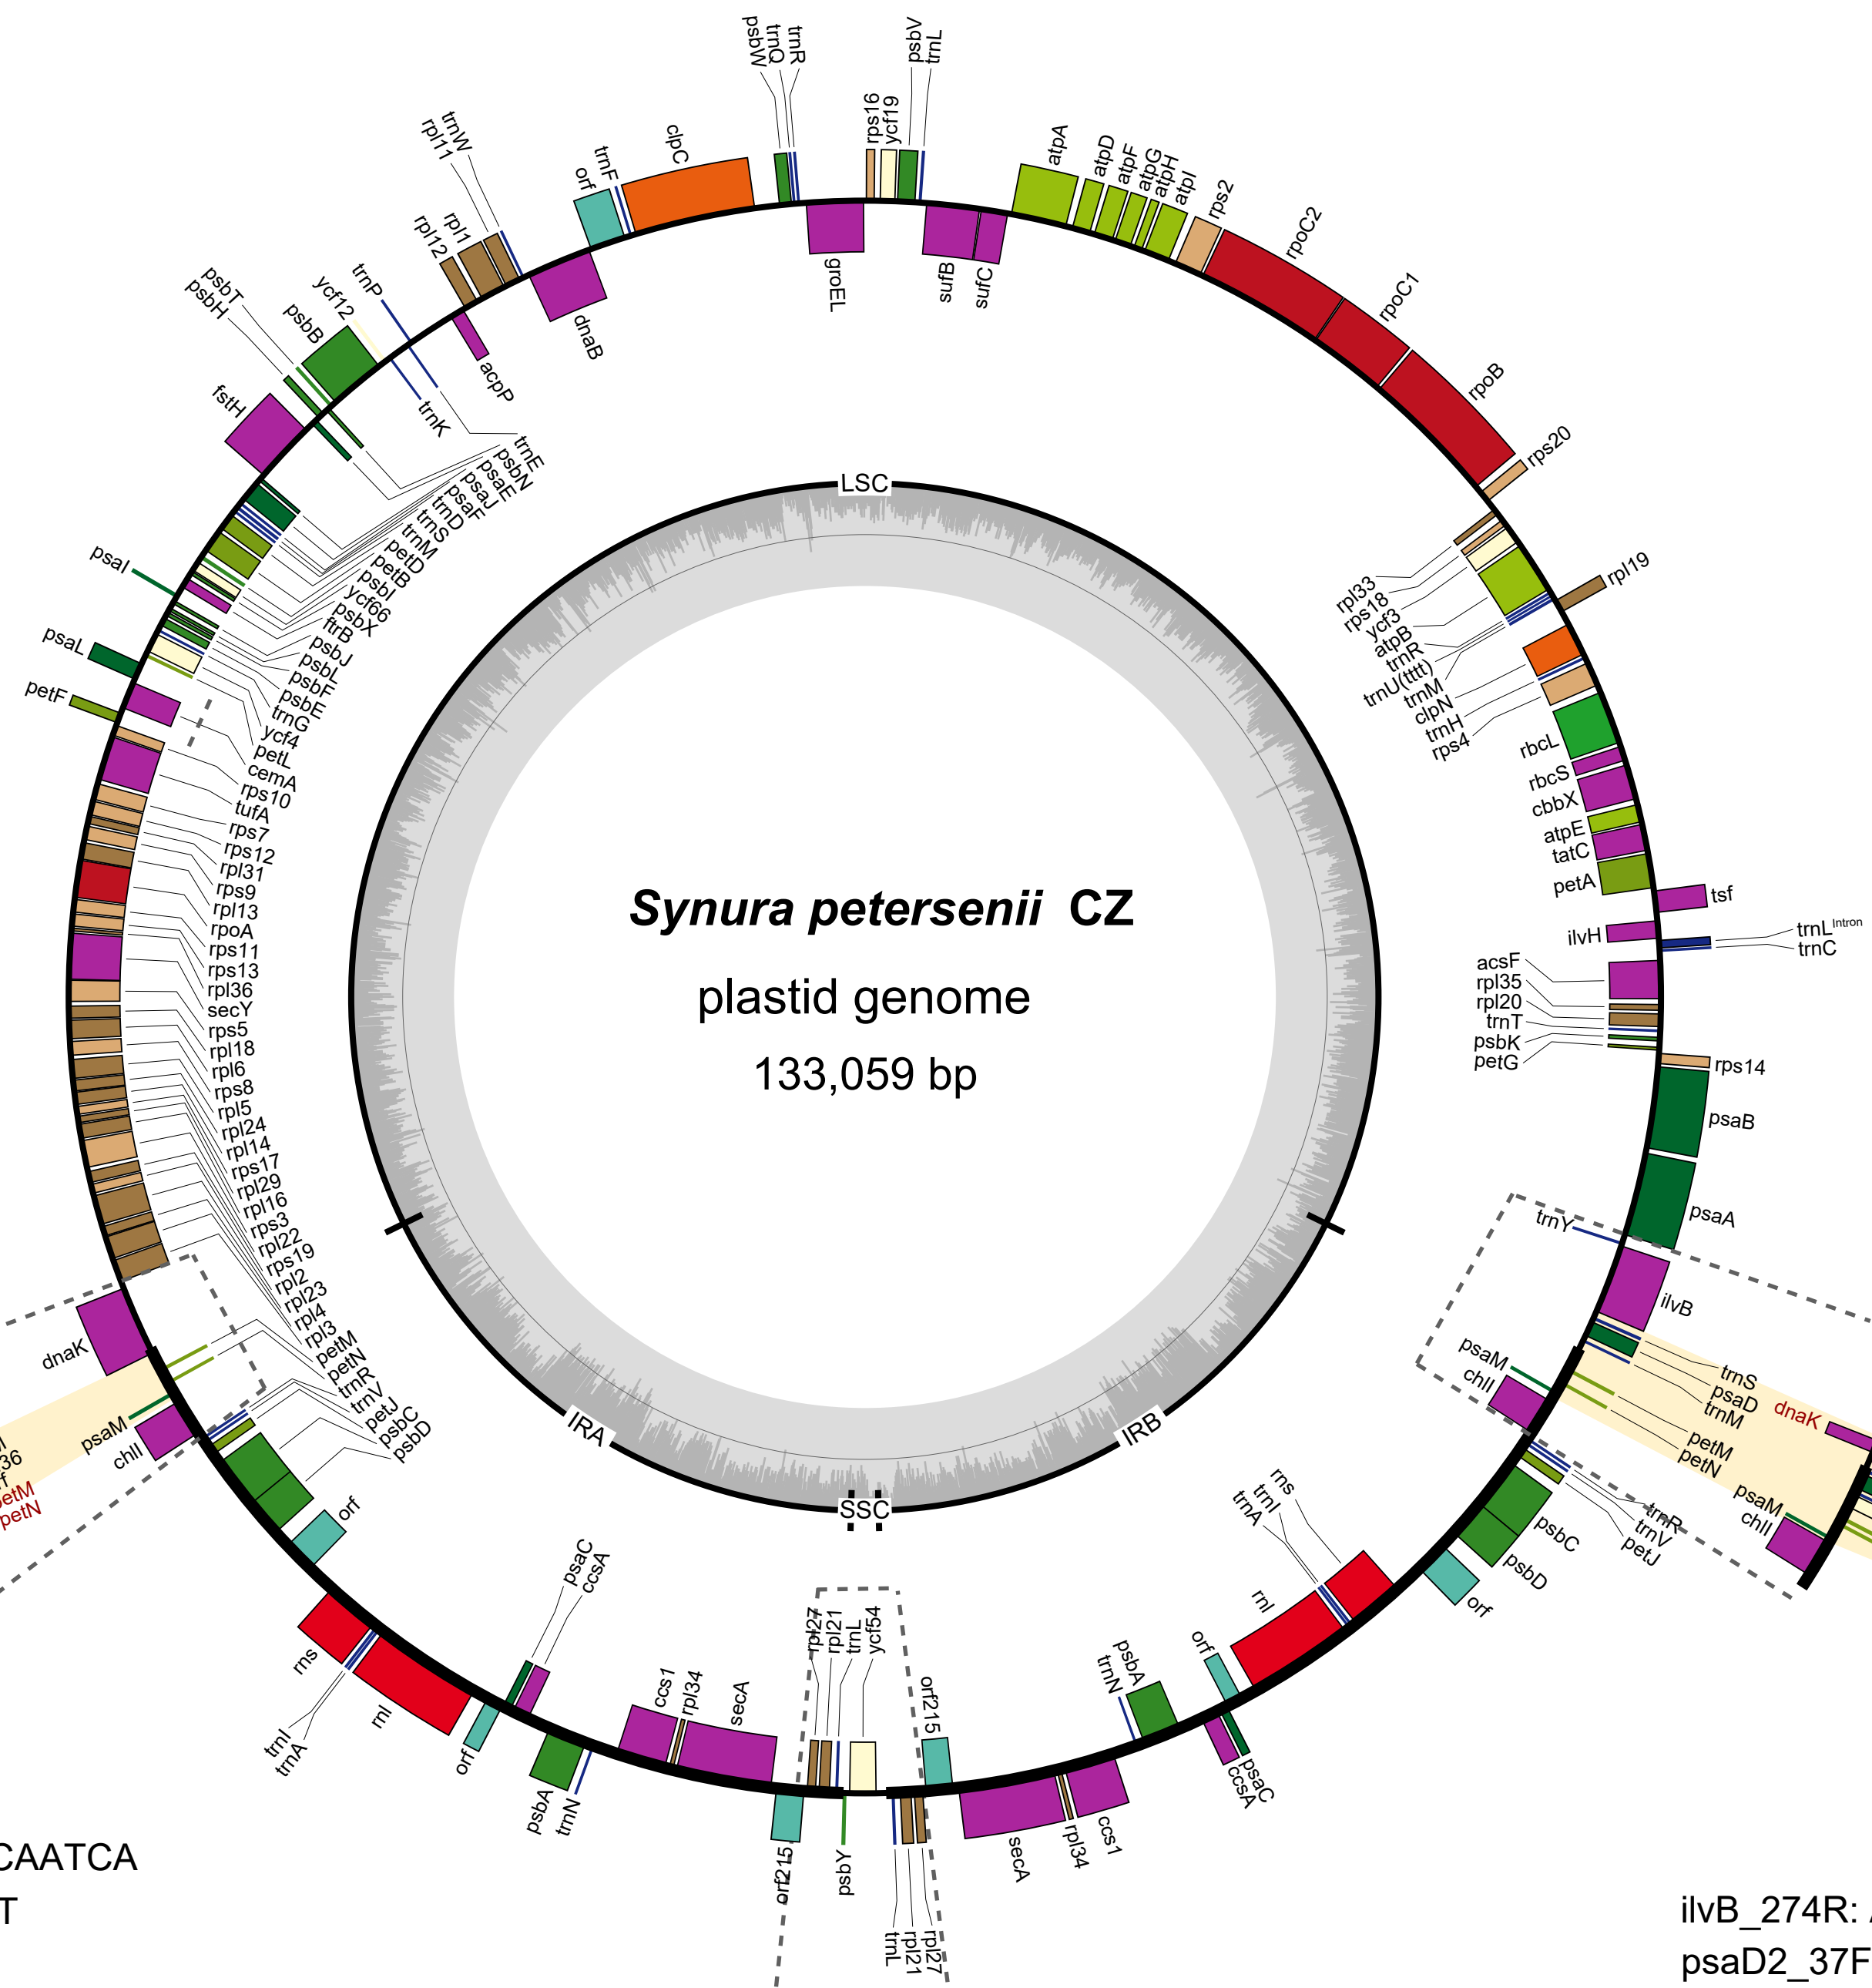

**IRA**

**IRB**

**SSC**

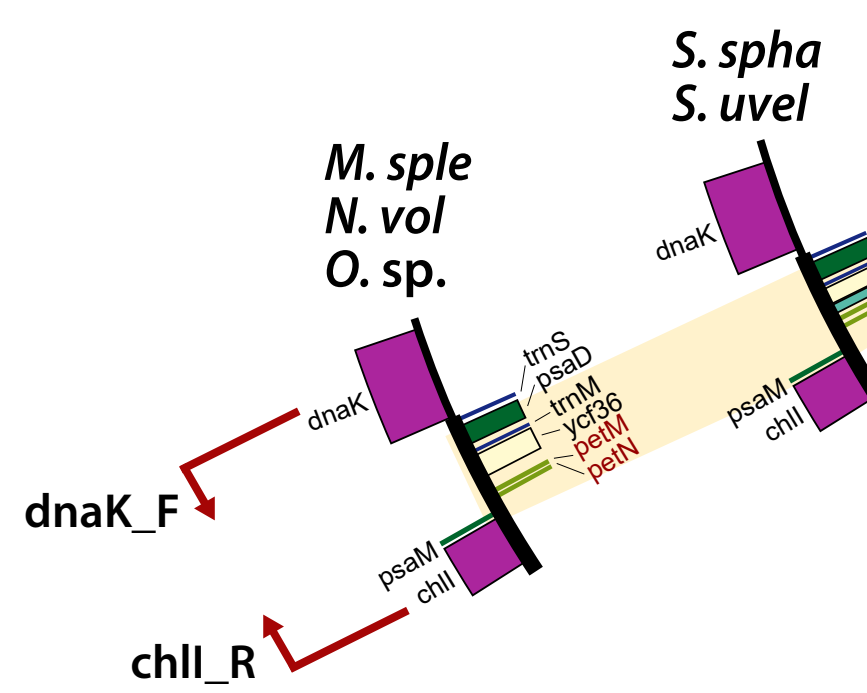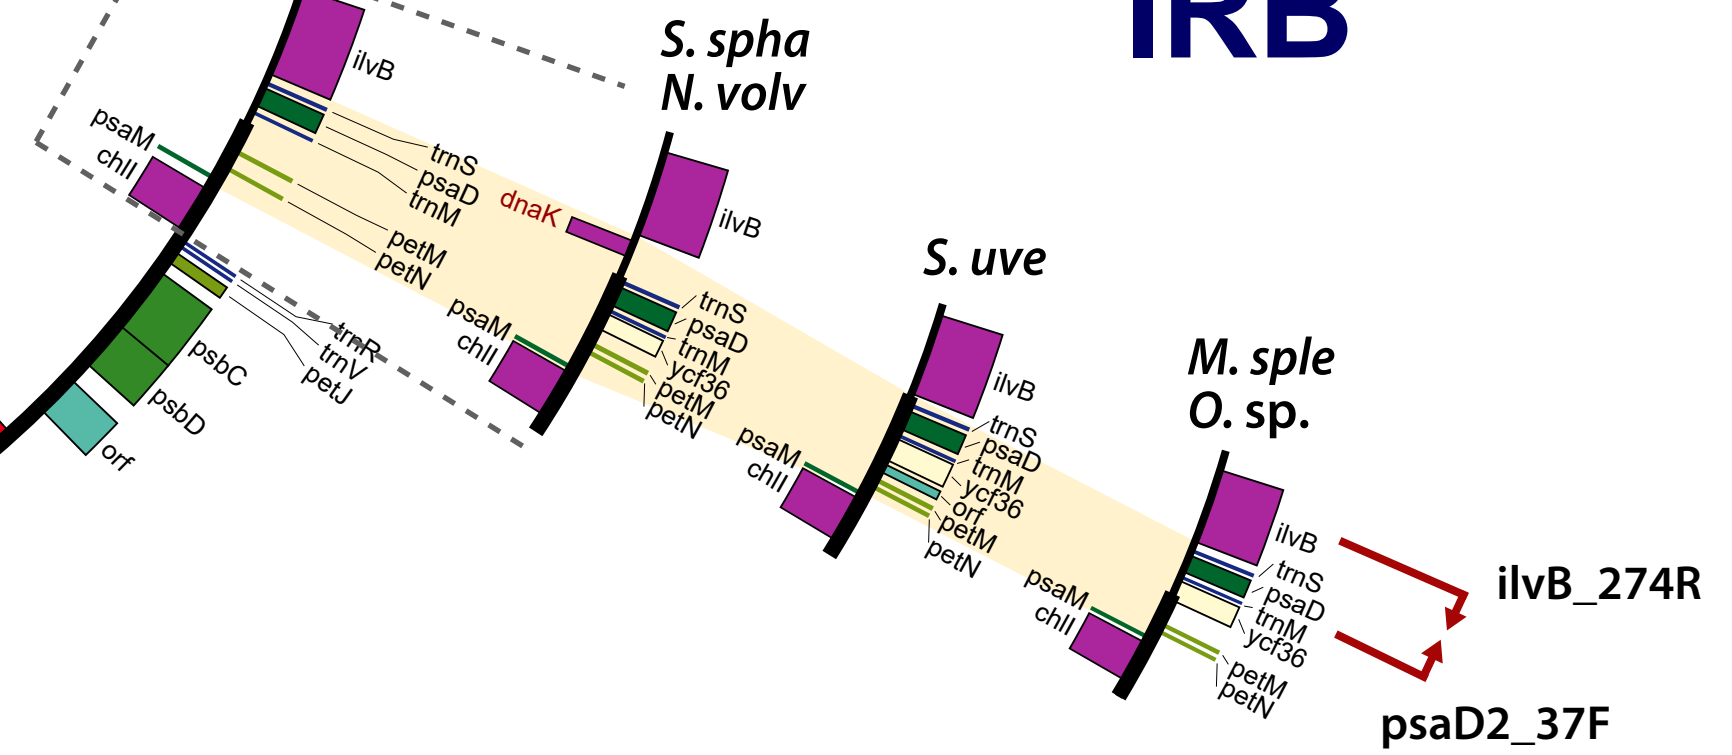

dnaK\_F: CGTGAAGAAAAACAGGTCAAGAACAATCA  
chlI\_R: TCCTGTTCTCGATCTCCCATAATCAT

ilvB\_274R: ATTTGTDGCTCCVGGHCCWGAWGTMGCAA  
psaD2\_37F: GSYGGAAGTACWGGDGGWTGGYTAS

*Synura petersenii*  
*Synura sphagnicola*  
*Mallomonas splendens*  
*Neotessella volvocina*

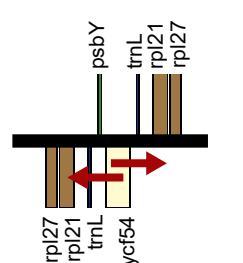

rpl21F: ACACGRGTATACGGTTGTCTATGACCA  
ycf54R: AGGTAACACTTCGATACATGGGT  
ycf54F: GCATTTGCTTGACCATAAATCCCATCA

*Synura uvella*

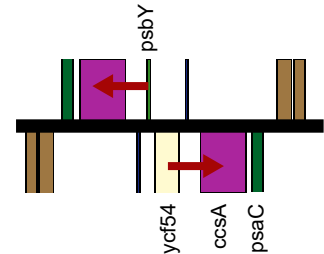

psbY\_F: AATTGCAGCTTCTTGGGCACTTTA  
ccsA\_R: CCCAACTGCCCTGAGATTATTCCTA  
ycf54F: GCATTTGCTTGACCATAAATCCCATCA
